# Supplementary material for: Low-Temperature Growing Anatase TiO2/SnO2 Multi-dimensional Heterojunctions at MXene Conductive Network for High-Efficient Perovskite Solar Cells
Source: PubMed Central journal article supplement (PMC7770768; doi:10.1007/s40820-020-0379-5), 2020-01-31
Supplement: 40820_2020_379_MOESM1_ESM.pdf [file 40820_2020_379_MOESM1_ESM.pdf]

Supporting Information for

## Low-temperature Growing Anatase-TiO<sub>2</sub>/SnO<sub>2</sub> Multi-dimensional Heterojunctions at MXene Conductive Network for High-efficient Perovskite Solar Cells

Linsheng Huang<sup>1</sup>, Xiaowen Zhou<sup>1</sup>, Rui Xue<sup>1</sup>, Pengfei Xu<sup>1</sup>, Siliang Wang<sup>1</sup>, Chao Xu<sup>1</sup>, Wei Zeng<sup>1, \*</sup>, Yi Xiong<sup>2, 3, \*</sup>, Hongqian Sang<sup>3, 4</sup>, Dong Liang<sup>1</sup>

<sup>1</sup>National Engineering Research Center for Agro-Ecological Big Data Analysis & Application, School of Electronics and Information Engineering, Anhui University, No.111 Jiulong Road, Hefei 230601, People's Republic of China

<sup>2</sup>Science and Technology Institute, Hubei Key Laboratory of Biomass Fibers & Eco-Dyeing & Finishing, Wuhan Textile University, Wuhan 430073, People's Republic of China

<sup>3</sup>School of Physics and Technology, MOE Key Laboratory of Artificial Micro- and Nano-Structures and Center for Electron Microscopy, Wuhan University, Wuhan 430072, People's Republic of China

<sup>4</sup>Department of Physics, King's College London, The Strand, London WC2R 2LS, United Kingdom

\*Corresponding authors. E-mail: youfmail@163.com (Wei Zeng); xiong@wtu.edu.cn or xiongyi@whu.edu.cn (Yi Xiong)

### Supplementary Figures

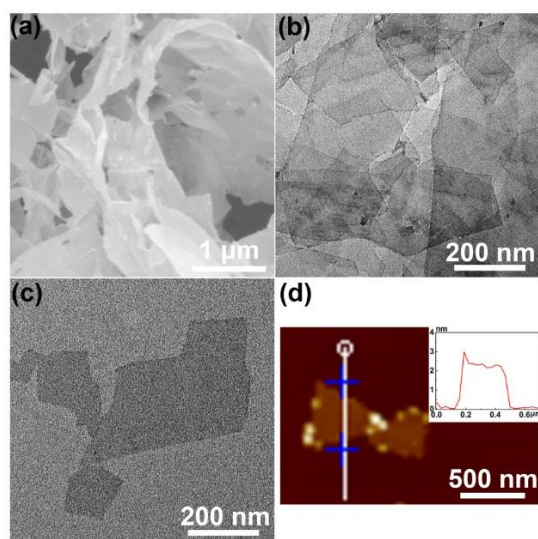

**Fig. S1** (a) The SEM morphology, (b-c) TEM morphologies, and (d) AFM surface morphology of resulted MXene material with its height profile in inset

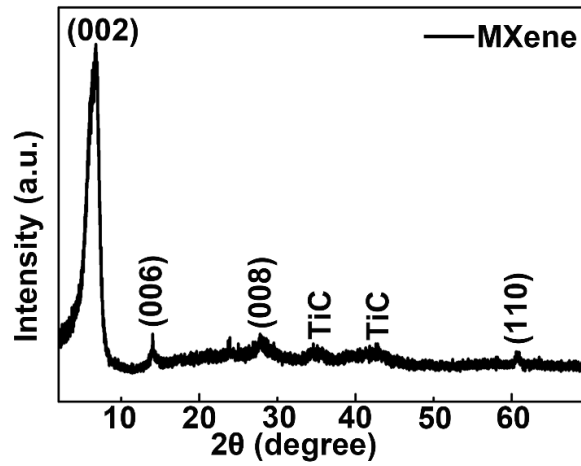

**Fig. S2** XRD pattern of resulted MXene material

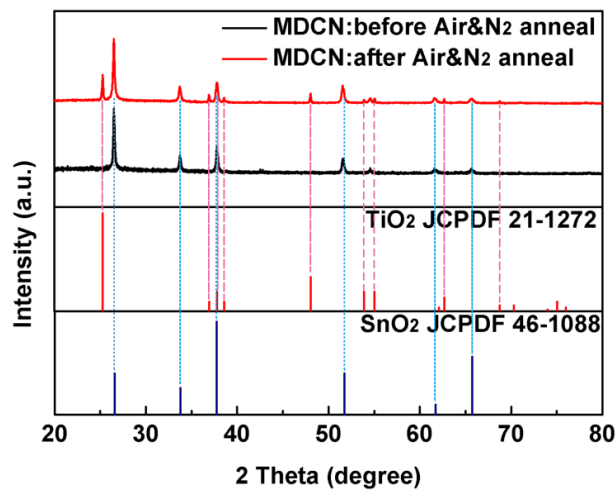

**Fig. S3** XRD patterns of MDCN before and after controlled anneal method in Air&N<sub>2</sub> atmospheres

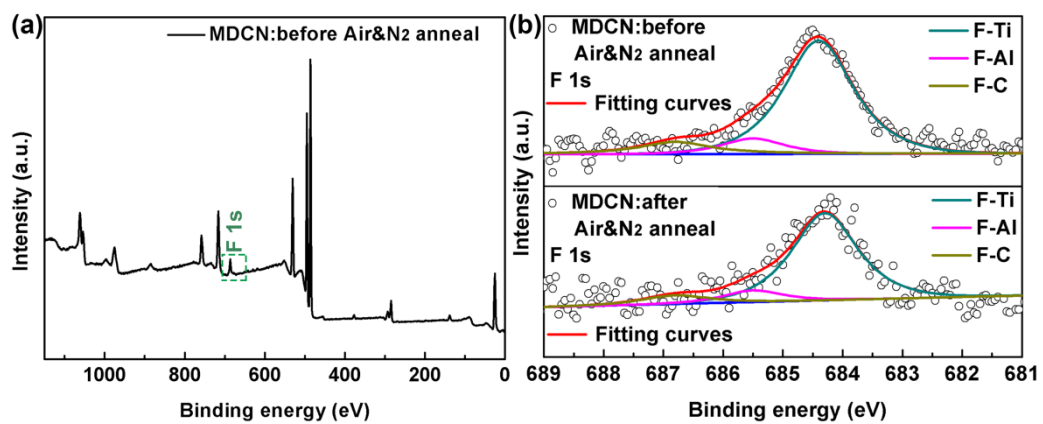

**Fig. S4** **a** The survey spectra of MDCN before controlled anneal. **b** The extracted F 1s spectra of MDCN samples before and after controlled anneal

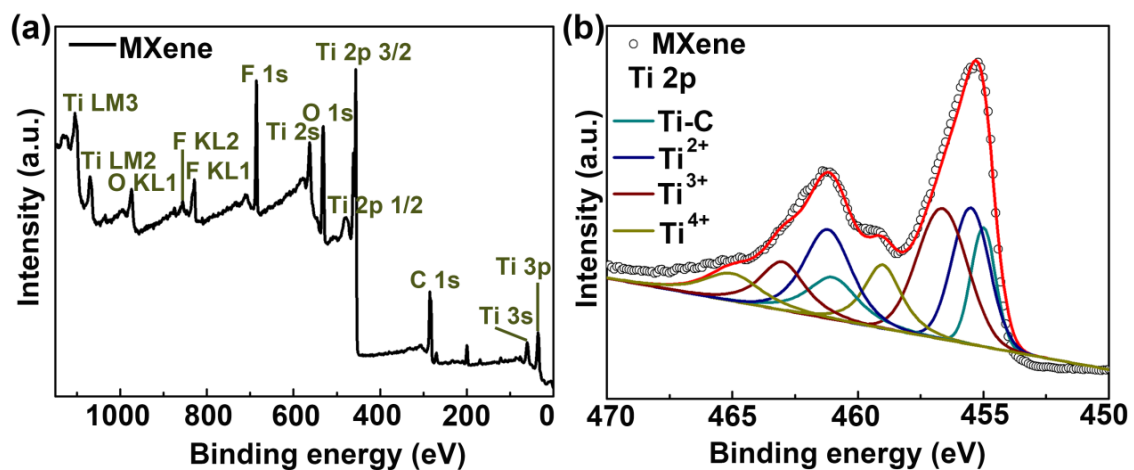

Fig. S5 Survey spectrum of **a** pure MXene **b** with its Ti 2p

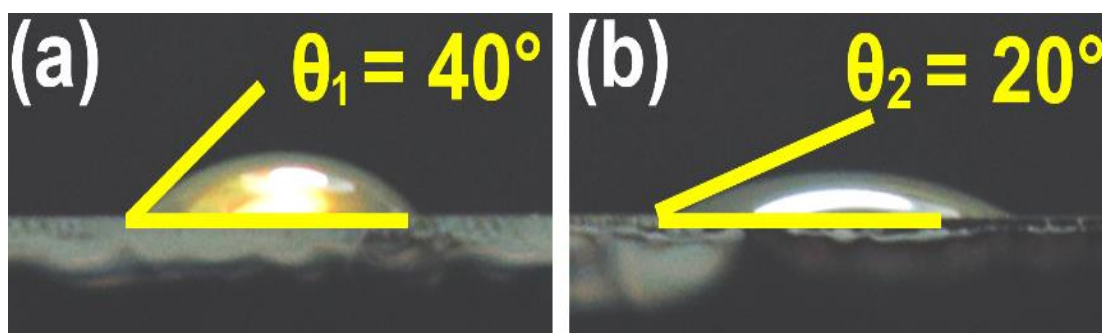

Fig. S6 Wetting angles of a water droplet on the **(a)** SnO<sub>2</sub> and **(b)** MDCN films

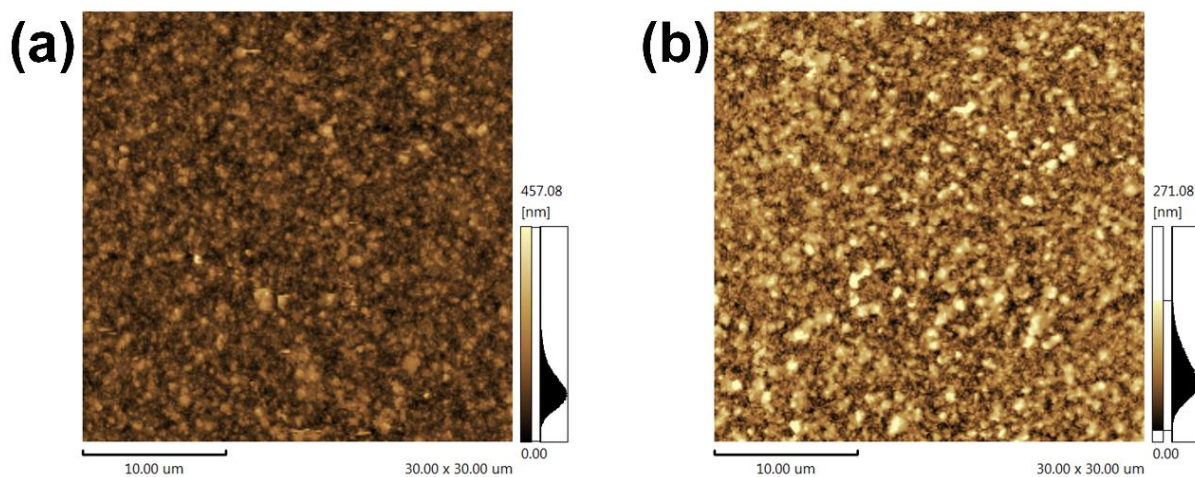

Fig. S7 AFM images of **(a)** SnO<sub>2</sub> and **(b)** MDCN surfaces

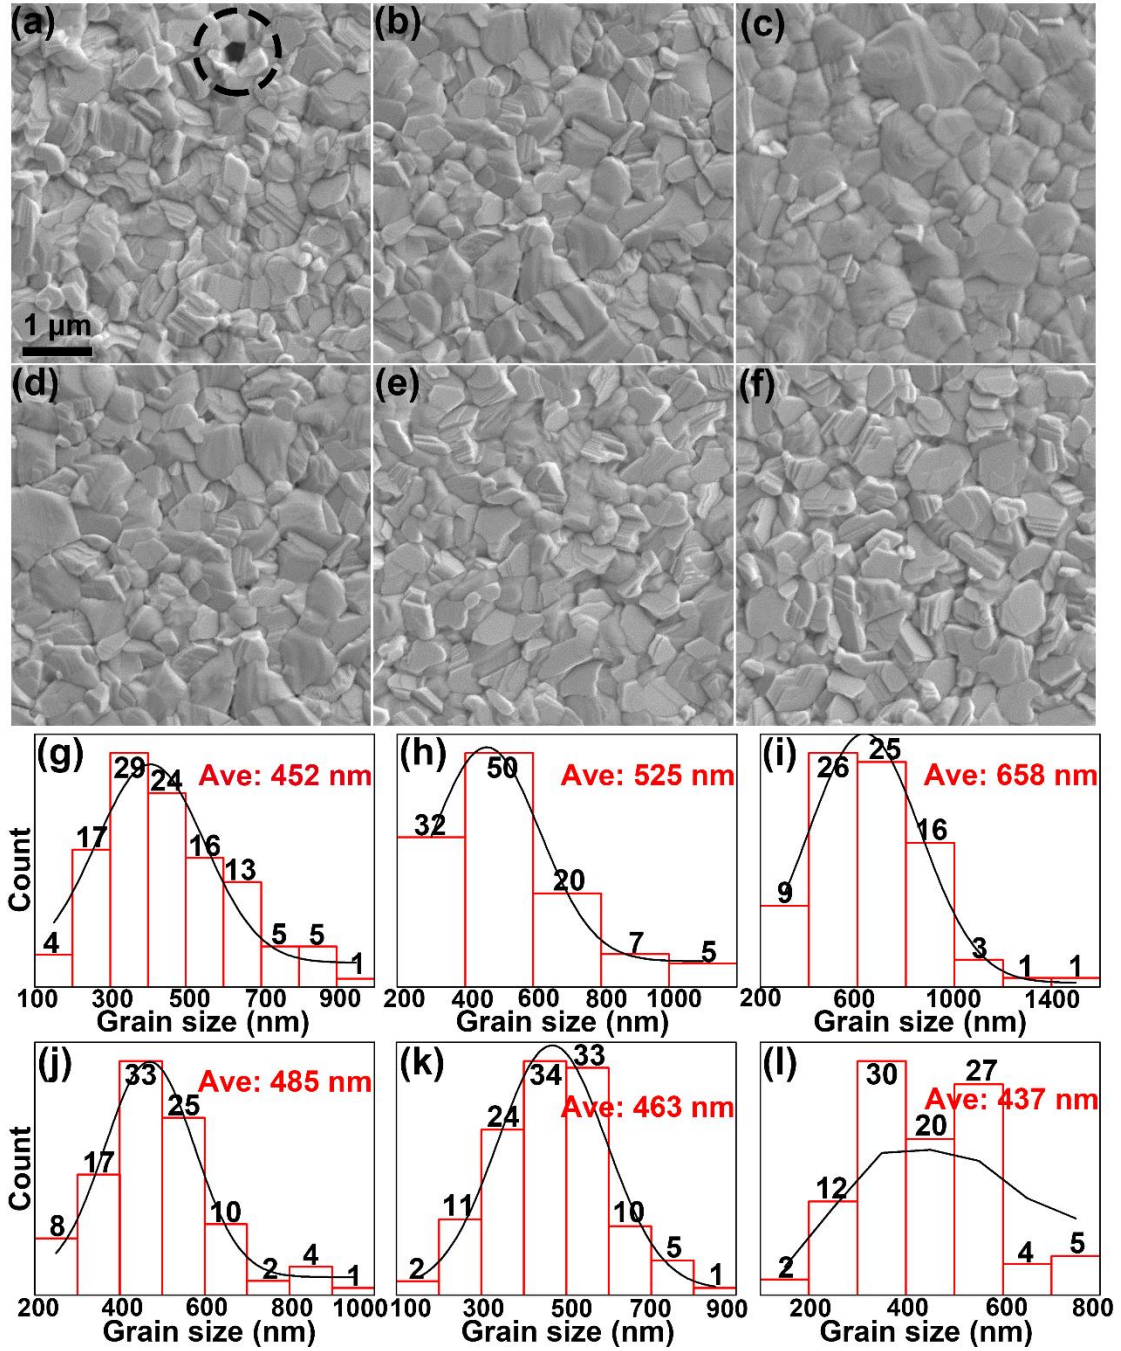

**Fig. S8** Top-view SEM images of perovskite/ETL/FTO with different ETL: (a) SnO<sub>2</sub>; (b) MDCN-0.01; (c) MDCN-0.02 (i.e., MDCN sample); (d) MDCN-0.03; (e) MDCN-0.05; (f) MDCN-0.1. (g-l) Statistic grain size distributions for perovskite film in (a-f)

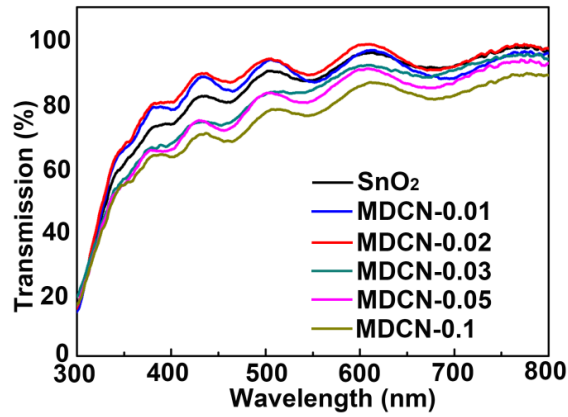

**Fig. S9** Transmittance spectra of SnO<sub>2</sub>, MDCN-0.01, MDCN-0.02, MDCN-0.03, MDCN-0.05, and MDCN-0.1 ETLs

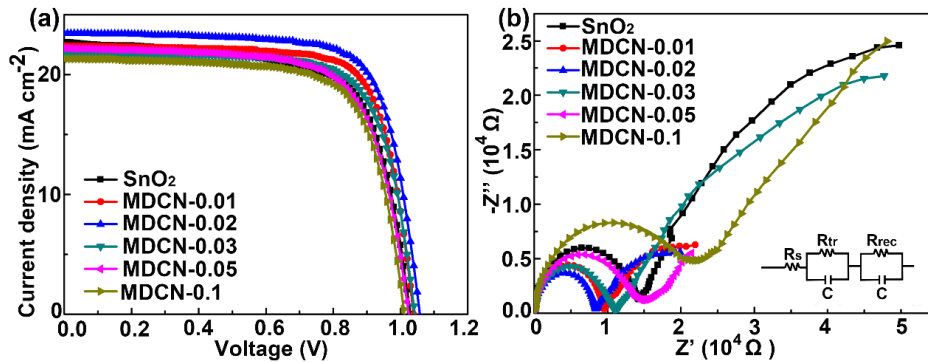

**Fig. S10** (a) J-V curves and (b) Nyquist plots of EIS for PSCs using SnO<sub>2</sub>, MDCN-0.01, MDCN-0.02, MDCN-0.03, MDCN-0.05, and MDCN-0.1 as ETLs. The equivalent circuit for (b) shown its inset.

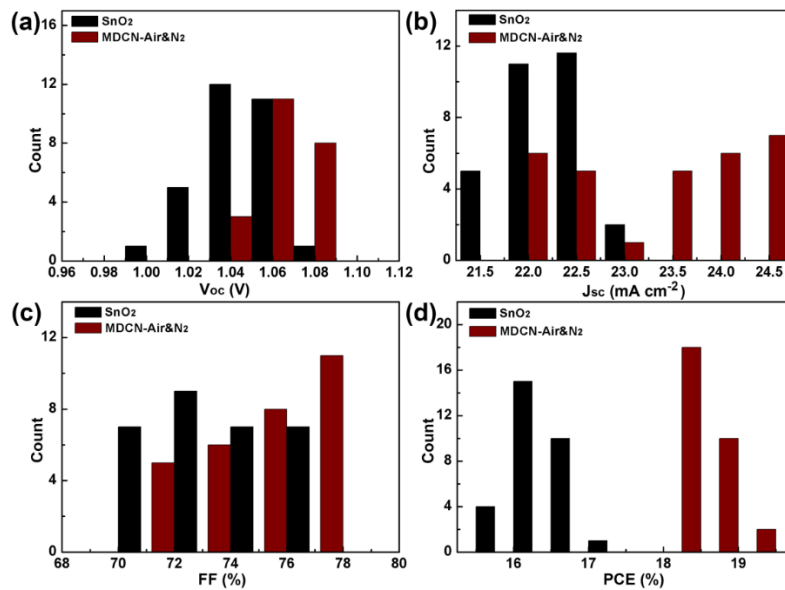

**Fig. S11** Histogram of parameters of PSCs with SnO<sub>2</sub> and MDCN-Air&N<sub>2</sub> ETLs

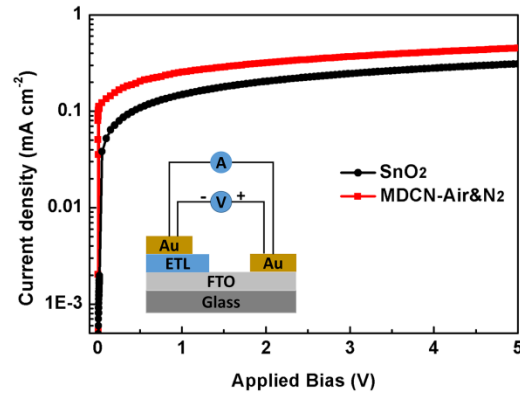

**Fig. S12** The SCLC curve of SnO<sub>2</sub> and MDCN-Air&N<sub>2</sub> layers with the test devices sketch in inset

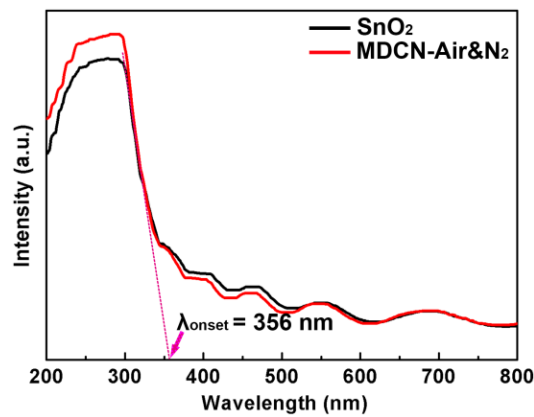

**Fig. S13** Absorption onset value measure for SnO<sub>2</sub> and MDCN-Air&N<sub>2</sub> samples with UV-vis absorption spectra

**Table S1** Atomic contents of different Ti-based bonds for pure MXene and MDCN

|            | Ti-C  | Ti <sup>2+</sup> | Ti <sup>3+</sup> | Ti <sup>4+</sup> |
|------------|-------|------------------|------------------|------------------|
| Pure MXene | 18.76 | 33.91            | 31.67            | 15.65            |
| MDCN       | 19.94 | 31.27            | 25.39            | 23.40            |

**Table S2** Device performance of PSCs based on ETLs with different MXene contents (30 samples for each type of ETL)

| ETL              | $V_{oc}$ (V) | $J_{sc}$ (mA cm <sup>-2</sup> ) | $FF$ (%)     | PCE (%)      |
|------------------|--------------|---------------------------------|--------------|--------------|
| SnO <sub>2</sub> | 1.03 ± 0.04  | 22.51 ± 1.56                    | 70.55 ± 3.11 | 16.42 ± 0.41 |
| MDCN-0.01        | 1.05 ± 0.05  | 22.73 ± 1.65                    | 72.89 ± 3.50 | 17.38 ± 0.48 |
| MDCN-0.02        | 1.07 ± 0.03  | 23.13 ± 1.39                    | 74.62 ± 3.35 | 18.44 ± 0.70 |
| MDCN-0.03        | 1.04 ± 0.05  | 21.92 ± 0.76                    | 73.14 ± 2.88 | 16.74 ± 0.24 |
| MDCN-0.05        | 1.03 ± 0.06  | 22.33 ± 1.79                    | 69.51 ± 3.84 | 15.93 ± 0.82 |
| MDCN-0.1         | 1.02 ± 0.04  | 21.76 ± 0.74                    | 69.71 ± 3.04 | 15.54 ± 0.44 |
